reasonable chance that definitive conclusions can be drawn. Such an approach should ensure that we gain the maximum benefit with minimum risk.

References

1. Rakotoambinina B, Timsit J, Deschamps I, Laborde K, Jos J, Boitard C, Assan R, Robert JJ: Cyclosporin A does not delay insulin dependency in asymptomatic IDDM patients. *Diabetes Care* 18:1487-1490, 1995
2. Stiller CR, Dupre J, Gent M, Jenner MR, Keown PA, Laupacis A, Martell R, Rodger NW, von Graffenried B, Wolfe BMJ: Effects of cyclosporin immunosuppression in insulin-dependent diabetes of recent onset. *Science* 223:1362-1367, 1984
3. Dupre J, Stiller CR, Gent M, Donner A, von Graffenried B, Murphy G, Heinrichs D, Jenner MR, Keown PA, Laupacis A, Mahon J, Martell R, Rodger NW, Wolfe BW: Effects of immunosuppression with cyclosporin in insulin-dependent diabetes mellitus of recent onset: the Canadian open study at 44 months. *Transplant Proc* 20 (Suppl. 4):184-192, 1988
4. Assan R, Feutren G, Sirmaj J: Cyclosporin trials in diabetes: updated results of the French experience. *Transplant Proc* 20 (Suppl. 4):178-183, 1988
5. Bougnères PF, Carel JC, Castano L, Boitard C, Gardin JP, Landais P, Hors J, Mihatsch MJ, Paillard M, Chaussain JL, Bach JF: Factors associated with early remission of type I diabetes in children treated with cyclosporin. *N Engl J Med* 318:633-670, 1988
6. Lipton R, LaPorte RE, Becker DJ, Dorman JS, Orchard TJ, Atchison J, Drash AD: Cyclosporin therapy for prevention and cure of IDDM. *Diabetes Care* 13:776-784, 1990
7. Pozzilli P: Intervention therapy for type I diabetes. *Diabetes Rev Int* 4:1-2, 1995
8. Harrison LC: Antigen-specific therapy for autoimmune disease: prospects for the prevention of insulin-dependent diabetes mellitus. *Mol Med*. In press

Authors' Response

The editorial by Dr. Allan Drash has raised very important issues on immune intervention trials. We wish to comment on the time and type of interventions and the design of such studies.

We fully agree that interventions—whatever the agents used—have until now been started very late, after the patient has become dependent on insulin. However, studies in the NOD mouse model have clearly shown that even when started at the stage of overt diabetes, some types of immune intervention can restore normoglycemia and even induce immune tolerance (1,2). These results raise the question of whether  $\beta$ -cell destruction is actually as far advanced at the onset of clinical diabetes as it is usually considered to be. They also suggest that provided efficient and well-tolerated agents are available, intervention at the stage of recent-onset diabetes may still deserve consideration. The question is not simply one of the time of intervention but also of the type and mechanism of action of the agent used.

It must be pointed out that at the time when our study was initiated, cyclosporin A was the only agent with a consistent efficacy in randomized placebo-controlled trials. In patients with insulin dependency, cyclosporin A did preserve partial insulin secretion for up to 4 years. The long-term benefit of this effect remains to be determined (3). Nephrotoxicity is one concern raised by the use of cyclosporin A, but its occurrence can be minimized by careful monitoring (4). Long-term follow-up (10 years) has shown that no clinical toxicity was detected in the treated patients (5; R.A., unpublished observation).

Another important issue is the design of intervention/prevention studies. We certainly agree that only carefully designed randomized studies involving sufficient numbers of subjects will draw reliable information. At best, these studies

should also be placebo-controlled. However, it seems very reasonable to assess the feasibility and the potential efficacy of new interventions in pilot studies before engaging hundreds of subjects in demanding trials that will last several years. This is exactly what has been done with the two agents, nicotinamide and insulin, that are currently tested in prediabetes (6,7). In the same respect, documenting efficacy, even partial, in patients with overt diabetes can be a preliminary step before intervening in prediabetic subjects.

JOSE TIMSIT  
INGEBORG DESCHAMPS  
CHRISTIAN BOITARD  
JEAN-JACQUES ROBERT  
ROGER ASSAN

From the Department of Clinical Immunology (J.T., C.B.) and Inserm U 25, Hôpital Necker-Enfants Malades, the Department of Paediatric Diabetology (I.D., J.-J.R.) and Inserm U 30, Hôpital Necker-Enfants Malades, and the Department of Diabetology (R.A.), Hôpital Bichat, Paris, France.

References

1. Maki T, Ichikawa T, Blanco R, Porter J: Long-term abrogation of autoimmune diabetes in nonobese diabetic mice by immunotherapy with anti-lymphocyte serum. *Proc Natl Acad Sci USA* 89:3434-3438, 1992
2. Chatenoud L, Thervet E, Primo J, Bach JF: Anti-CD3 antibody induces long-term remission of overt autoimmunity in non-obese diabetic mice. *Proc Natl Acad Sci USA* 91:123-127, 1993
3. De Filippo G, Carel JC, Landais P, Bach JF, Boitard C, Bougnères PF: Long-term results of early cyclosporin therapy in juvenile type I insulin-dependent diabetes. *Diabetes*. In press
4. Feutren G, Mihatsch MF: Risk factors for cyclosporine-induced nephropathy in patients with autoimmune diseases. *N Engl J*

- Med* 326:1654–1660, 1993
5. Assan R, Timsit J, Feutren G, Bougnères P, Czernichow P, Hannedouche T, Boitard C, Noël LH, Mihatsch MJ, Bach JF: The kidney in cyclosporin A-treated diabetic patients: a long-term clinicopathological study. *Clin Nephrol* 41:41–49, 1994
  6. Elliot RB, Chase HP: Prevention or delay of type I (insulin-dependent) diabetes mellitus in children using nicotinamide. *Diabetologia* 34:362–365, 1991
  7. Keller RJ, Eisenbarth GS, Jackson RA: Insulin prophylaxis in individuals at high-risk of type I diabetes. *Lancet* 341:927–928, 1993
